# Supplementary material for: Prokaryotic Solute/Sodium Symporters: Versatile Functions and Mechanisms of a Transporter Family †
Source: PubMed Central journal article supplement (PMC7918813; doi:10.3390/ijms22041880), 2021-02-13
Supplement: ijms-22-01880-s001.pdf [file ijms-22-01880-s001.pdf]

## Supplementary Information

# Prokaryotic solute/sodium symporters: versatile functions and mechanisms of a transporter family

Tania Henriquez <sup>1</sup>, Larissa Wirtz <sup>1</sup>, Dan Su <sup>1</sup> and Heinrich Jung <sup>1,\*</sup>

<sup>1</sup> Microbiology, Dept. Biology 1, Ludwig Maximilians University Munich, D-82152 Martinsried, Germany

\* Correspondence: [hjung@lmu.de](mailto:hjung@lmu.de); Tel.: +49-89-218074630



**Supplementary Figure S1.** Amino acid sequence alignment of the SSS family transporters SGLT of *V. parahaemolyticus* (vSGLT), SiaT of *P. mirabilis* (PmSiaT) and PutP of *E. coli* (EcPutP). The alignment was performed with Clustal Omega [1]. Amino acid sequences forming TMDs are underlined. TMDs are numbered as described in Figure 2a. Amino acids highlighted in **red** coordinate sodium at the Na2 site, while amino acids in **orange** belong to the recently described Na3 site of PmSiaT. Amino acids labeled in **blue** constitute the central substrate binding site. Amino acids highlighted in **blue** and *italic* interact with the substrate via water molecules. Amino acids highlighted in **brown** form the outer “thin” hydrophobic gate. For PutP, amino acids of particular functional significance are highlighted in **bold** (compare also Table 2). Information was taken from the following references: vSGLT [2,3], PmSiaT [4], EcPutP [5-9].

**Supplementary Table S1. Amino acids involved in sodium and substrate binding in PutP, vSGLT and SiaT<sup>a</sup>**

| Function                                               | PutP                                                                   | vSGLT                                                                       | SiaT                                                                        |
|--------------------------------------------------------|------------------------------------------------------------------------|-----------------------------------------------------------------------------|-----------------------------------------------------------------------------|
| Na2 site                                               | cTMD1: A53, M56<br>cTMD8: A337, S340,<br>T341                          | cTMD1: A62, I65<br>cTMD8: A361, S364,<br>S365                               | cTMD1: A56, L59<br>cTMD8: A339, S342,<br>S343                               |
| Na3 site                                               | cTMD5: D187 (?)<br>cTMD8: S340 (?),<br>C344 (?),<br>Q345 (?)           | no experimental<br>evidence                                                 | cTMD5: D182<br>cTMD8: S342, S345<br>S346                                    |
| central substrate<br>binding site                      | cTMD1: S54, S57 (?)<br>cTMD6: Y248, P252 (?)<br>cTMD8: C344, M369 (?)  | cTMD1: Q69<br>cTMD2: E88, S91<br>cTMD6: N260<br>cTMD7: K294<br>cTMD10: Q428 | cTMD1: T58, S60, T63<br>cTMD2: F78, Q82<br>cTMD3: R135<br>cTMD6: N247, Q250 |
| 2 <sup>nd</sup> substrate<br>binding site <sup>b</sup> | cTMD1: S57, W59 (?)<br>cTMD6: W244, Y248 (?)<br>cTMD10: L398, S402 (?) | cTMD1: S66 (?)<br>cTMD6: Y269, R273 (?)<br>cTMD8: S365, S368 (?)            | no experimental<br>evidence                                                 |

<sup>a</sup>The data of the sodium and the central substrate binding sites of vSGLT and PmSiaT were taken from the analyses of respective crystal structures [4,10]. For PutP, the amino acids proposed to be involved in sodium and substrate binding were identified by amino acid replacements in combination with comprehensive analyses of transport kinetics, ligand affinities and site directed labeling approaches [5-8]. The location of a 2<sup>nd</sup> substrate binding site in PutP and vSGLT was predicted based on computational analyses in combination with amino acid replacements, substrate binding and transport studies [11].

<sup>b</sup>Of note: Structural alignments between LeuT and vSGLT revealed that the crystallographically identified galactose-binding site in vSGLT [10] is located in a more extracellular location relative to the central substrate-binding site in LeuT. Therefore, the existence of an additional galactose-binding site in vSGLT was suggested and experimentally tested that aligns to the central binding site of LeuT [11]. Following this logic, the amino acids of vSGLT listed in the table under “2<sup>nd</sup> substrate binding site” constitute the central binding site while the amino acids listed under “central binding site” form a more external binding site.

**Supplementary Table S2.** Information of the isolates from the SMART database used for Figure 5.

| Number in Figure 5 | Isolates (Organisms/SMART ID)                                                               |
|--------------------|---------------------------------------------------------------------------------------------|
| 1                  | <i>Candidatus Nitrosocaldus cavascurens</i> / <a href="#">A0A2K5ARA0_9ARCH</a> (A0A2K5ARA0) |
| 2                  | <i>Pseudomonas stutzeri</i> / <a href="#">A0A0H3Z2P6_PSEST</a> (A0A0H3Z2P6)                 |
| 3                  | <i>Pseudomonas fluorescens</i> Q2-87/ <a href="#">J2EGW4_PSEFL</a> (J2EGW4)                 |
| 4                  | <i>Pseudomonas corrugata</i> / <a href="#">A0A1B3C9J6_9PSED</a> (A0A1B3C9J6)                |
| 5                  | <i>Actinospica acidiphila</i> / <a href="#">UPI00052494D7</a>                               |
| 6                  | <i>Streptomyces griseorubens</i> / <a href="#">UPI00056BF26D</a>                            |
| 7                  | <i>Streptomyces albus</i> / <a href="#">UPI000689E04F</a>                                   |
| 8                  | <i>Streptomyces gilvosporeus</i> / <a href="#">A0A1V0TJU0_9ACTN</a> (A0A1V0TJU0)            |

## References

- Madeira, F.; Park, Y.m.; Lee, J.; Buso, N.; Gur, T.; Madhusoodanan, N.; Basutkar, P.; Tivey, A.R.N.; Potter, S.C.; Finn, R.D., et al. The EMBL-EBI search and sequence analysis tools APIs in 2019. *Nucleic Acids Research* **2019**, *47*, W636-W641, doi:10.1093/nar/gkz268.
- Watanabe, A.; Choe, S.; Chaptal, V.; Rosenberg, J.M.; Wright, E.M.; Grabe, M.; Abramson, J. The mechanism of sodium and substrate release from the binding pocket of vSGLT. *Nature* **2010**, *468*, 988-991, doi:10.1038/nature09580.
- Faham, S.; Watanabe, A.; Besserer, G.M.; Cascio, D.; Specht, A.; Hirayama, B.A.; Wright, E.M.; Abramson, J. The crystal structure of a sodium galactose transporter reveals mechanistic insights into Na<sup>+</sup>/sugar symport. *Science* **2008**, *321*, 810-814, doi:10.1126/science.1160406.
- Wahlgren, W.Y.; Dunevall, E.; North, R.A.; Paz, A.; Scalise, M.; Bisignano, P.; Bengtsson-Palme, J.; Goyal, P.; Claesson, E.; Caing-Carlsson, R., et al. Substrate-bound outward-open structure of a Na<sup>+</sup>-coupled sialic acid symporter reveals a new Na<sup>+</sup> site. *Nat Commun* **2018**, *9*, 1753, doi:10.1038/s41467-018-04045-7.
- Hilger, D.; Böhm, M.; Hackmann, A.; Jung, H. Role of Ser-340 and Thr-341 in transmembrane domain IX of the Na<sup>+</sup>/proline transporter PutP of *Escherichia coli* in ligand binding and transport. *Journal of Biological Chemistry* **2008**, *283*, 4921-4929, doi:10.1074/jbc.M706741200.
- Quick, M.; Jung, H. A conserved aspartate residue, Asp187, is important for Na<sup>+</sup>-dependent proline binding and transport by the Na<sup>+</sup>/proline transporter of *Escherichia coli*. *Biochemistry* **1998**, *37*, 13800-13806, doi:10.1021/bi980562j.
- Pirch, T.; Quick, M.; Nietschke, M.; Langkamp, M.; Jung, H. Sites important for Na<sup>+</sup> and substrate binding in the Na<sup>+</sup>/proline transporter of *Escherichia coli*, a member of the Na<sup>+</sup>/solute symporter family. *J Biol Chem* **2002**, *277*, 8790-8796, doi:10.1074/jbc.M111008200.
- Olkhova, E.; Raba, M.; Bracher, S.; Hilger, D.; Jung, H. Homology model of the Na<sup>+</sup>/proline transporter PutP of *Escherichia coli* and its functional implications. *J Mol Biol* **2011**, *406*, 59-74, doi:10.1016/j.jmb.2010.11.045.

9. Bracher, S.; Schmidt, C.C.; Dittmer, S.I.; Jung, H. Core transmembrane domain 6 plays a pivotal role in the transport cycle of the sodium/proline symporter PutP. *The Journal of biological chemistry* **2016**, *291*, 26208-26215, doi:10.1074/jbc.M116.753103.
10. Faham, S.; Watanabe, A.; Besserer, G.M.; Cascio, D.; Specht, A.; Hirayama, B.A.; Wright, E.M.; Abramson, J. The crystal structure of a sodium galactose transporter reveals mechanistic insights into Na<sup>+</sup>/sugar symport. *Science* **2008**, *321*, 810-814.
11. Li, Z.; Lee, A.S.; Bracher, S.; Jung, H.; Paz, A.; Kumar, J.P.; Abramson, J.; Quick, M.; Shi, L. Identification of a second substrate-binding site in solute-sodium symporters. *J Biol Chem* **2015**, *290*, 127-141, doi:10.1074/jbc.M114.584383.
